# Supplementary material
Source: MDPI journal article supplement (https://www.mdpi.com/2306-5710/5/4/70)
Supplement: s1 [file s1]

Supplementary Table 4. Concentrations ( $\mu\text{g/L}$ ) of analysed esters, C6 compounds, terpenes and C13 compounds in Chardonnay and Shiraz wines during production.

| <sup>a</sup> Chardonnay       | Control       |    | LCu           |    | HCu           |    | LSO2          |    | HSO2          |    |
|-------------------------------|---------------|----|---------------|----|---------------|----|---------------|----|---------------|----|
| <i>ethyl butyrate</i>         |               |    |               |    |               |    |               |    |               |    |
| PAF                           | 537 ± 20      | b  | 1077 ± 192    | a  | 520 ± 59      | b  | 440 ± 44      | b  | 549 ± 39      | b  |
| PB_nonB                       | 382 ± 16      | a  | 391 ± 32      | a  | 323 ± 13      | b  | 360 ± 7       | a  | 357 ± 8       | a  |
| PB_Bent                       | 359 ± 9       | a  | 344 ± 6       | a  | 354 ± 25      | a  | 345 ± 18      | a  | 352 ± 5       | a  |
| <i>ethyl hexanoate</i>        |               |    |               |    |               |    |               |    |               |    |
| PAF                           | 1835 ± 75     | b  | 2480 ± 565    | a  | 1431 ± 115    | b  | 1570 ± 318    | b  | 1752 ± 144    | b  |
| PB_nonB                       | 1547 ± 84     | a  | 1497 ± 112    | a  | 1185 ± 100    | b  | 1405 ± 46     | a  | 1418 ± 129    | a  |
| PB_Bent                       | 1399 ± 64     | a  | 1214 ± 15     | b  | 1376 ± 115    | a  | 1310 ± 75     | ab | 1393 ± 33     | a  |
| <i>ethyl octanoate</i>        |               |    |               |    |               |    |               |    |               |    |
| PAF                           | 1536 ± 60     | ab | 2158 ± 322    | a  | 1257 ± 136    | b  | 1263 ± 163    | b  | 1557 ± 235    | b  |
| PB_nonB                       | 1396 ± 28     | ab | 1480 ± 99     | a  | 1228 ± 132    | b  | 1326 ± 64     | ab | 1356 ± 75     | ab |
| PB_Bent                       | 1272 ± 117    | a  | 1176 ± 22     | a  | 1333 ± 123    | a  | 1190 ± 93     | a  | 1287 ± 16     | a  |
| <i>ethyl decanoate</i>        |               |    |               |    |               |    |               |    |               |    |
| PAF                           | 8.0 ± 0.3     | ab | 9.5 ± 2.1     | a  | 5.7 ± 1.2     | b  | 6.2 ± 1.0     | b  | 6.7 ± 0.8     | b  |
| PB_nonB                       | 6.7 ± 0.4     | c  | 6.7 ± 0.3     | c  | 6.6 ± 0.4     | c  | 7.5 ± 0.1     | b  | 8.2 ± 0.2     | a  |
| PB_Bent                       | 6.7 ± 0.7     | a  | 6.1 ± 0.3     | ab | 5.0 ± 0.3     | c  | 5.6 ± 0.6     | bc | 5.7 ± 0.3     | bc |
| <i>ethyl dodecanoate</i>      |               |    |               |    |               |    |               |    |               |    |
| PAF                           | 3079 ± 141    | a  | 3104 ± 1101   | a  | 1430 ± 90     | b  | 2259 ± 223    | ab | 2589 ± 447    | ab |
| PB_nonB                       | 1785 ± 251    | bc | 1679 ± 142    | bc | 1619 ± 217    | c  | 2068 ± 94     | b  | 2712 ± 219    | a  |
| PB_Bent                       | 1581 ± 3      | a  | 1568 ± 104    | a  | 1077 ± 154    | b  | 1420 ± 326    | ab | 1474 ± 101    | ab |
| <i>propyl acetate</i>         |               |    |               |    |               |    |               |    |               |    |
| PAF                           | 217 ± 11      | b  | 488 ± 133     | a  | 294 ± 50      | b  | 164 ± 24      | b  | 197 ± 16      | b  |
| PB_nonB                       | 160 ± 5       | bc | 204 ± 25      | a  | 177 ± 8       | b  | 138 ± 1       | cd | 125 ± 9       | d  |
| PB_Bent                       | 143 ± 9       | c  | 173 ± 13      | b  | 206 ± 23      | a  | 133 ± 6       | c  | 128 ± 4       | c  |
| <i>isobutyl acetate</i>       |               |    |               |    |               |    |               |    |               |    |
| PAF                           | 109.1 ± 4.3   | bc | 263.7 ± 45.7  | a  | 148.4 ± 30.1  | b  | 97.4 ± 20.3   | c  | 109.1 ± 6.4   | bc |
| PB_nonB                       | 68.1 ± 2.1    | bc | 84.5 ± 7.8    | a  | 74.3 ± 2.6    | b  | 64.5 ± 2.6    | c  | 63.1 ± 0.6    | c  |
| PB_Bent                       | 63.6 ± 1.8    | bc | 74.6 ± 1.5    | ab | 85.5 ± 11.4   | a  | 59.0 ± 4.7    | c  | 58.9 ± 0.7    | c  |
| <i>butyl acetate</i>          |               |    |               |    |               |    |               |    |               |    |
| PAF                           | 4.40 ± 0.23   | b  | 7.69 ± 1.46   | a  | 5.16 ± 0.90   | b  | 4.28 ± 0.59   | b  | 4.28 ± 0.35   | b  |
| PB_nonB                       | 3.24 ± 0.08   | a  | 3.77 ± 0.45   | a  | 3.60 ± 0.22   | a  | 3.47 ± 0.42   | a  | 3.26 ± 0.20   | a  |
| PB_Bent                       | 2.99 ± 0.14   | b  | 4.18 ± 1.09   | a  | 3.62 ± 0.38   | ab | 2.83 ± 0.10   | b  | 2.87 ± 0.08   | b  |
| <i>isoamyl acetate</i>        |               |    |               |    |               |    |               |    |               |    |
| PAF                           | 6007 ± 46     | bc | 11079 ± 2262  | a  | 9625 ± 2840   | ab | 4979 ± 770    | c  | 6105 ± 496    | bc |
| PB_nonB                       | 3973 ± 115    | b  | 4781 ± 586    | a  | 4078 ± 66     | b  | 3834 ± 137    | b  | 3650 ± 83     | b  |
| PB_Bent                       | 3663 ± 150    | b  | 4284 ± 240    | ab | 4793 ± 895    | a  | 3513 ± 120    | b  | 3463 ± 49     | b  |
| <i>hexyl acetate</i>          |               |    |               |    |               |    |               |    |               |    |
| PAF                           | 492 ± 37      | b  | 827 ± 175     | a  | 538 ± 101     | b  | 443 ± 104     | b  | 487 ± 45      | b  |
| PB_nonB                       | 454 ± 28      | ab | 516 ± 51      | a  | 425 ± 60      | ab | 401 ± 23      | b  | 367 ± 5       | b  |
| PB_Bent                       | 407 ± 16      | b  | 400 ± 19      | b  | 515 ± 52      | a  | 382 ± 13      | b  | 411 ± 7       | b  |
| <i>cis-3-hexenyl acetate</i>  |               |    |               |    |               |    |               |    |               |    |
| PAF                           | 8.38 ± 0.41   | b  | 14.00 ± 2.63  | a  | 8.53 ± 1.28   | b  | 6.99 ± 0.69   | b  | 8.54 ± 0.73   | b  |
| PB_nonB                       | 8.68 ± 0.78   | a  | 11.50 ± 3.87  | a  | 7.57 ± 0.94   | a  | 8.07 ± 0.51   | a  | 7.85 ± 0.84   | a  |
| PB_Bent                       | 8.14 ± 0.77   | ab | 7.46 ± 0.38   | b  | 9.07 ± 0.79   | a  | 7.68 ± 0.01   | b  | 8.10 ± 0.19   | ab |
| <i>phenylethyl acetate</i>    |               |    |               |    |               |    |               |    |               |    |
| PAF                           | 531 ± 17      | b  | 886 ± 158     | a  | 833 ± 232     | a  | 437 ± 91      | b  | 449 ± 39      | b  |
| PB_nonB                       | 569 ± 31      | ab | 626 ± 124     | a  | 569 ± 61      | ab | 530 ± 34      | ab | 451 ± 24      | b  |
| PB_Bent                       | 500 ± 11      | ab | 566 ± 35      | ab | 649 ± 141     | a  | 470 ± 16      | c  | 481 ± 44      | c  |
| <i>ethyl isobutyrate</i>      |               |    |               |    |               |    |               |    |               |    |
| PAF                           | 4.56 ± 0.41   | b  | 9.24 ± 1.15   | a  | 3.54 ± 0.74   | b  | 3.71 ± 0.66   | b  | 4.76 ± 0.37   | b  |
| PB_nonB                       | 4.21 ± 0.20   | ab | 4.32 ± 0.06   | a  | 3.71 ± 0.11   | c  | 3.82 ± 0.30   | bc | 4.48 ± 0.21   | a  |
| PB_Bent                       | 4.06 ± 0.26   | a  | 4.72 ± 1.09   | a  | 3.79 ± 0.26   | a  | 3.99 ± 0.75   | a  | 3.96 ± 0.17   | a  |
| <i>ethyl 2-methylbutyrate</i> |               |    |               |    |               |    |               |    |               |    |
| PAF                           | 0.554 ± 0.017 | b  | 1.061 ± 0.165 | a  | 0.482         |    | 0.455 ± 0.061 | b  | 0.579 ± 0.052 | b  |
| PB_nonB                       | 0.516 ± 0.023 | ab | 0.547 ± 0.015 | a  | 0.465 ± 0.024 | b  | 0.483 ± 0.035 | b  | 0.568 ± 0.027 | a  |
| PB_Bent                       | 0.509 ± 0.017 | a  | 0.589 ± 0.162 | a  | 0.417 ± 0.091 | a  | 0.488 ± 0.097 | a  | 0.515 ± 0.011 | a  |
| <i>ethyl phenylacetate</i>    |               |    |               |    |               |    |               |    |               |    |
| PAF                           | 0.412 ± 0.021 | b  | 0.916 ± 0.140 | a  | 0.353 ± 0.037 | b  | 0.336 ± 0.055 | b  | 0.419 ± 0.034 | b  |
| PB_nonB                       | 0.297 ± 0.017 | b  | 0.357 ± 0.011 | ab | 0.310 ± 0.019 | b  | 0.313 ± 0.032 | b  | 0.394 ± 0.045 | a  |

|                               |                 |    |                 |    |                 |    |                 |    |                 |    |
|-------------------------------|-----------------|----|-----------------|----|-----------------|----|-----------------|----|-----------------|----|
| PB_Bent                       | 0.328 ± 0.036   | ab | 0.372 ± 0.011   | a  | 0.328 ± 0.046   | ab | 0.281 ± 0.023   | b  | 0.295 ± 0.047   | ab |
| <i>ethyl propanoate</i>       |                 |    |                 |    |                 |    |                 |    |                 |    |
| PAF                           | 156 ± 6         | b  | 368 ± 57        | a  | 164 ± 14        | b  | 130 ± 24        | b  | 168 ± 23        | b  |
| PB_nonB                       | 116 ± 2         | b  | 132 ± 6         | a  | 113 ± 7         | b  | 99 ± 6          | c  | 108 ± 3         | bc |
| PB_Bent                       | 106 ± 4         | ab | 118 ± 2         | a  | 119 ± 13        | a  | 99 ± 12         | b  | 109 ± 5         | ab |
| <i>ethyl cinnamate</i>        |                 |    |                 |    |                 |    |                 |    |                 |    |
| PAF                           | 0.358 ± 0.085   | b  | 0.587 ± 0.105   | a  | 0.288 ± 0.012   | b  | 0.218 ± 0.021   | b  | 0.243 ± 0.008   | b  |
| PB_nonB                       | 0.289 ± 0.003   | b  | 0.557 ± 0.044   | a  | 0.348 ± 0.055   | b  | 0.281 ± 0.015   | b  | 0.287 ± 0.003   | b  |
| PB_Bent                       | 0.304 ± 0.016   | a  | 0.340 ± 0.017   | a  | 0.363 ± 0.049   | a  | 0.317 ± 0.025   | a  | 0.392 ± 0.082   | a  |
| <i>ethyl dihydrocinnamate</i> |                 |    |                 |    |                 |    |                 |    |                 |    |
| PAF                           | 0.154 ± 0.026   | ab | 0.201 ± 0.038   | a  | 0.145 ± 0.088   | ab | 0.099 ± 0.008   | b  | 0.124 ± 0.010   | ab |
| PB_nonB                       | 0.145 ± 0.008   | b  | 0.214 ± 0.031   | a  | 0.114 ± 0.022   | b  | 0.139 ± 0.007   | b  | 0.159 ± 0.017   | b  |
| PB_Bent                       | 0.147 ± 0.006   | a  | 0.140 ± 0.009   | a  | 0.106 ± 0.021   | b  | 0.136 ± 0.008   | a  | 0.164 ± 0.011   | a  |
| <i>hexanol</i>                |                 |    |                 |    |                 |    |                 |    |                 |    |
| PAF                           | 23.2 ± 1.5      | b  | 40.1 ± 11.9     | a  | 23.4 ± 1.2      | b  | 21.8 ± 4.1      | b  | 23.2 ± 3.9      | b  |
| PB_nonB                       | 27.1 ± 1.4      | ab | 29.2 ± 3.4      | a  | 22.5 ± 1.8      | bc | 21.7 ± 2.5      | c  | 19.8 ± 2.1      | c  |
| PB_Bent                       | 23.2 ± 4.5      | a  | 22.3 ± 1.2      | a  | 28.5 ± 3.2      | a  | 24.3 ± 1.9      | a  | 23.0 ± 2.5      | a  |
| <i>trans-3-hexanol</i>        |                 |    |                 |    |                 |    |                 |    |                 |    |
| PAF                           | 1.96 ± 0.23     | ab | 2.24 ± 0.33     | a  | 1.92 ± 0.24     | ab | 1.73 ± 0.13     | b  | 1.81 ± 0.08     | b  |
| PB_nonB                       | 1.84 ± 0.03     | b  | 2.36 ± 0.18     | a  | 1.73 ± 0.03     | b  | 1.91 ± 0.18     | b  | 1.82 ± 0.12     | b  |
| PB_Bent                       | 1.69 ± 0.15     | a  | 1.80 ± 0.07     | a  | 1.85 ± 0.06     | a  | 1.75 ± 0.17     | a  | 1.82 ± 0.05     | a  |
| <i>cis-3-hexanol</i>          |                 |    |                 |    |                 |    |                 |    |                 |    |
| PAF                           | 3.32 ± 0.27     | b  | 4.29 ± 0.73     | a  | 3.20 ± 0.08     | b  | 3.04 ± 0.29     | b  | 3.23 ± 0.18     | b  |
| PB_nonB                       | 3.17 ± 0.36     | b  | 4.19 ± 0.47     | a  | 3.14 ± 0.09     | b  | 3.30 ± 0.14     | b  | 3.17 ± 0.18     | b  |
| PB_Bent                       | 3.03 ± 0.34     | a  | 3.22 ± 0.03     | a  | 3.49 ± 0.16     | a  | 3.10 ± 0.38     | a  | 3.49 ± 0.40     | a  |
| <i>cis-2-hexanol</i>          |                 |    |                 |    |                 |    |                 |    |                 |    |
| PAF                           | 4.06 ± 0.14     | b  | 4.56 ± 0.23     | a  | 4.27 ± 0.28     | ab | 4.02 ± 0.18     | b  | 3.94 ± 0.00     | b  |
| PB_nonB                       | 3.94 ± 0.04     | b  | 4.48 ± 0.10     | a  | 3.95 ± 0.01     | b  | 4.04 ± 0.16     | b  | 3.99 ± 0.05     | b  |
| PB_Bent                       | 3.97 ± 0.04     | b  | 3.97 ± 0.02     | b  | 4.44 ± 0.28     | a  | 4.10 ± 0.15     | ab | 4.22 ± 0.30     | ab |
| <i>trans-geraniol</i>         |                 |    |                 |    |                 |    |                 |    |                 |    |
| PAF                           | 329 ± 23        | b  | 215 ± 1         | d  | 163 ± 9         | c  | 256 ± 6         | c  | 372 ± 33        | a  |
| PB_nonB                       | 259 ± 74        | ab | 272 ± 3         | ab | 183 ± 3         | b  | 177 ± 16        | b  | 300 ± 2         | a  |
| PB_Bent                       | 262 ± 38        | a  | 234 ± 23        | a  | 111 ± 25        | b  | 247 ± 27        | a  | 154 ± 3         | b  |
| <i>α-terpinene</i>            |                 |    |                 |    |                 |    |                 |    |                 |    |
| PAF                           | 0.0384 ± 0.0007 | a  | 0.0372 ± 0.0006 | a  | 0.0377 ± 0.0005 | a  | 0.0379 ± 0.0089 | a  | 0.0373 ± 0.0044 | a  |
| PB_nonB                       | 0.0479 ± 0.0027 | a  | 0.0375 ± 0.0007 | b  | 0.0359 ± 0.0013 | b  | 0.0415 ± 0.0060 | b  | 0.0400 ± 0.0018 | b  |
| PB_Bent                       | 0.0370 ± 0.0014 | b  | 0.0370 ± 0.0028 | b  | 0.0495 ± 0.0027 | a  | 0.0354 ± 0.0023 | b  | 0.0363 ± 0.0006 | b  |
| <i>γ-terpinene</i>            |                 |    |                 |    |                 |    |                 |    |                 |    |
| PAF                           | 0.0345 ± 0.0005 | a  | 0.0345 ± 0.0007 | a  | 0.0344 ± 0.0008 | a  | 0.0351 ± 0.0019 | a  | 0.0347 ± 0.0003 | a  |
| PB_nonB                       | 0.0442 ± 0.0021 | a  | 0.0358 ± 0.0004 | b  | 0.0349 ± 0.0021 | b  | 0.0389 ± 0.0046 | b  | 0.0383 ± 0.0010 | b  |
| PB_Bent                       | 0.0343 ± 0.0014 | b  | 0.0352 ± 0.0022 | b  | 0.0451 ± 0.0054 | a  | 0.0335 ± 0.0009 | b  | 0.0350 ± 0.0023 | b  |
| <i>terpinolene</i>            |                 |    |                 |    |                 |    |                 |    |                 |    |
| PAF                           | 0.044 ± 0.001   | ab | 0.049 ± 0.001   | a  | 0.042 ± 0.001   | c  | 0.046 ± 0.006   | ab | 0.041 ± 0.004   | c  |
| PB_nonB                       | 0.102 ± 0.009   | a  | 0.048 ± 0.001   | c  | 0.045 ± 0.002   | c  | 0.078 ± 0.024   | ab | 0.063 ± 0.001   | bc |
| PB_Bent                       | 0.044 ± 0.002   | b  | 0.054 ± 0.009   | b  | 0.096 ± 0.011   | a  | 0.042 ± 0.002   | b  | 0.042 ± 0.003   | b  |
| <i>linalool</i>               |                 |    |                 |    |                 |    |                 |    |                 |    |
| PAF                           | 0.828 ± 0.032   | a  | 0.948 ± 0.038   | a  | 0.870 ± 0.037   | a  | 1.038 ± 0.311   | a  | 0.987 ± 0.131   | a  |
| PB_nonB                       | 0.933 ± 0.129   | ab | 0.998 ± 0.113   | a  | 0.869 ± 0.077   | ab | 0.832 ± 0.045   | ab | 0.775 ± 0.009   | b  |
| PB_Bent                       | 1.340 ± 0.283   | a  | 1.013 ± 0.188   | ab | 1.048 ± 0.213   | ab | 0.842 ± 0.124   | b  | 0.902 ± 0.131   | b  |
| <i>α-terpineol</i>            |                 |    |                 |    |                 |    |                 |    |                 |    |
| PAF                           | 0.891 ± 0.092   | c  | 1.828 ± 0.265   | a  | 1.721 ± 0.236   | ab | 1.167 ± 0.004   | c  | 1.288 ± 0.396   | bc |
| PB_nonB                       | 37.731 ± 2.682  | a  | 1.879 ± 0.439   | d  | 2.003 ± 0.052   | d  | 24.626 ± 12.915 | b  | 14.505 ± 0.971  | c  |
| PB_Bent                       | 1.128 ± 0.147   | bc | 1.900 ± 0.767   | b  | 38.324 ± 0.004  | a  | 0.642 ± 0.018   | c  | 0.821 ± 0.098   | c  |
| <i>trans-geranylacetone</i>   |                 |    |                 |    |                 |    |                 |    |                 |    |
| PAF                           | 0.255 ± 0.058   | ab | 0.121 ± 0.002   | c  | 0.252 ± 0.075   | ab | 0.156 ± 0.029   | bc | 0.289 ± 0.022   | a  |
| PB_nonB                       | 0.230 ± 0.017   | a  | 0.250 ± 0.022   | a  | 0.258 ± 0.013   | a  | 0.542 ± 0.184   | a  | 0.606 ± 0.010   | a  |
| PB_Bent                       | 0.258 ± 0.029   | a  | 0.239 ± 0.032   | a  | 0.172 ± 0.002   | a  | 0.228 ± 0.021   | a  | 0.261 ± 0.050   | a  |
| <i>citronellol</i>            |                 |    |                 |    |                 |    |                 |    |                 |    |
| PAF                           | 15.2 ± 0.1      | b  | 12.3 ± 0.8      | c  | 10.3 ± 0.9      | d  | 11.1 ± 1.5      | cd | 17.1 ± 1.0      | a  |
| PB_nonB                       | 13.8 ± 0.9      | a  | 15.7 ± 0.4      | a  | 11.1 ± 1.6      | b  | 13.9 ± 1.1      | a  | 15.5 ± 1.0      | a  |
| PB_Bent                       | 14.9 ± 2.2      | a  | 15.4 ± 1.4      | a  | 11.7 ± 0.6      | a  | 12.3 ± 1.5      | a  | 12.6 ± 2.7      | a  |
| <i>nerolidol</i>              |                 |    |                 |    |                 |    |                 |    |                 |    |
| PAF                           | 3.85 ± 0.44     | a  | 3.04 ± 0.25     | bc | 2.67 ± 0.30     | c  | 2.61 ± 0.29     | c  | 3.30 ± 0.06     | b  |

|                               |                     |               |    |               |     |               |    |               |    |               |    |
|-------------------------------|---------------------|---------------|----|---------------|-----|---------------|----|---------------|----|---------------|----|
|                               | PB_nonB             | 3.30 ± 0.40   | a  | 3.52 ± 0.36   | a   | 3.25 ± 0.04   | a  | 3.39 ± 0.01   | a  | 3.67 ± 0.58   | a  |
|                               | PB_Bent             | 3.03 ± 0.64   | a  | 3.73 ± 0.07   | a   | 3.37 ± 0.34   | a  | 2.67 ± 0.16   | a  | 3.13 ± 0.64   | a  |
| <i>β-ionone</i>               |                     |               |    |               |     |               |    |               |    |               |    |
|                               | PAF                 | 0.035 ± 0.001 | b  | 0.039 ± 0.003 | ab  | 0.036 ± 0.001 | b  | 0.035 ± 0.004 | b  | 0.042 ± 0.001 | a  |
|                               | PB_nonB             | 0.041 ± 0.001 | ab | 0.047 ± 0.004 | a   | 0.039 ± 0.003 | b  | 0.042 ± 0.005 | ab | 0.039 ± 0.001 | b  |
|                               | PB_Bent             | 0.047 ± 0.004 | a  | 0.040 ± 0.003 | ab  | 0.040 ± 0.005 | ab | 0.039 ± 0.002 | b  | 0.041 ± 0.004 | ab |
| <i>β-damascenone</i>          |                     |               |    |               |     |               |    |               |    |               |    |
|                               | PAF                 | 1.52 ± 0.08   | ab | 1.56 ± 0.05   | ab  | 1.41 ± 0.11   | ab | 1.32 ± 0.20   | b  | 1.66 ± 0.20   | a  |
|                               | PB_nonB             | 3.47 ± 0.05   | a  | 3.63 ± 0.13   | a   | 3.08 ± 0.23   | b  | 2.89 ± 0.30   | b  | 2.83 ± 0.12   | b  |
|                               | PB_Bent             | 4.24 ± 0.48   | a  | 3.68 ± 0.20   | ab  | 3.78 ± 0.28   | ab | 3.32 ± 0.37   | b  | 3.28 ± 0.61   | b  |
|                               |                     |               |    |               |     |               |    |               |    |               |    |
|                               | <sup>a</sup> Shiraz | Control       |    | LCu           |     | HCu           |    | LSO2          |    | HSO2          |    |
|                               |                     |               |    |               |     |               |    |               |    |               |    |
| <i>ethyl butyrate</i>         |                     |               |    |               |     |               |    |               |    |               |    |
|                               | PAF                 | 104 ± 4       | c  | 133 ± 6       | b   | 133 ± 6       | b  | 127 ± 12      | b  | 158 ± 6       | a  |
|                               | PB                  | 76 ± 2        | c  | 86 ± 1        | b   | 86 ± 3        | b  | 82 ± 2        | b  | 103 ± 5       | a  |
| <i>ethyl hexanoate</i>        |                     |               |    |               |     |               |    |               |    |               |    |
|                               | PAF                 | 202 ± 8       | c  | 242 ± 14      | ab  | 246 ± 15      | ab | 229 ± 31      | bc | 265 ± 9       | a  |
|                               | PB                  | 151 ± 12      | c  | 173 ± 1       | b   | 176 ± 9       | ab | 151 ± 8       | c  | 189 ± 3       | a  |
| <i>ethyl octanoate</i>        |                     |               |    |               |     |               |    |               |    |               |    |
|                               | PAF                 | 213 ± 9       | c  | 221 ± 15      | c   | 286 ± 10      | b  | 356 ± 12      | a  | 267 ± 16      | b  |
|                               | PB                  | 146 ± 5       | c  | 149 ± 0       | b   | 167 ± 8       | ab | 149 ± 8       | c  | 182 ± 8       | a  |
| <i>ethyl decanoate</i>        |                     |               |    |               |     |               |    |               |    |               |    |
|                               | PAF                 | 0.639 ± 0.083 | c  | 0.688 ± 0.023 | c   | 1.185 ± 0.055 | b  | 1.429 ± 0.115 | a  | 1.067 ± 0.216 | b  |
|                               | PB                  | 0.260 ± 0.032 | c  | 0.241 ± 0.036 | c   | 0.281 ± 0.009 | c  | 0.325 ± 0.003 | b  | 0.460 ± 0.016 | a  |
| <i>ethyl dodecanoate</i>      |                     |               |    |               |     |               |    |               |    |               |    |
|                               | PAF                 | 114 ± 5       | b  | 132 ± 5       | b   | 194 ± 16      | a  | 220 ± 0       | a  | 203 ± 37      | a  |
|                               | PB                  | 97 ± 9        | b  | 86 ± 9        | b   | 67 ± 4        | c  | 98 ± 3        | b  | 121 ± 8       | a  |
| <i>propyl acetate</i>         |                     |               |    |               |     |               |    |               |    |               |    |
|                               | PAF                 | 42.2 ± 0.9    | a  | 48.2 ± 1.1    | a   | 55.5 ± 2.2    | a  | 41.8 ± 1.7    | a  | 45.4 ± 3.6    | a  |
|                               | PB                  | 33.8 ± 1.2    | bc | 36.3 ± 2.9    | ab  | 39.0 ± 0.7    | a  | 27.4 ± 1.3    | d  | 31.8 ± 1.2    | c  |
| <i>isobutyl acetate</i>       |                     |               |    |               |     |               |    |               |    |               |    |
|                               | PAF                 | 43.3 ± 1.6    | b  | 53.0 ± 2.7    | a   | 52.0 ± 4.1    | a  | 40.5 ± 3.4    | b  | 51.7 ± 1.5    | a  |
|                               | PB                  | 30.4 ± 1.2    | a  | 32.4 ± 3.6    | a   | 29.6 ± 0.8    | a  | 25.7 ± 1.0    | b  | 32.0 ± 1.2    | a  |
| <i>butyl acetate</i>          |                     |               |    |               |     |               |    |               |    |               |    |
|                               | PAF                 | 1.64 ± 0.24   | b  | 1.93 ± 0.15   | b   | 1.70 ± 0.10   | b  | 1.70 ± 0.06   | b  | 2.50 ± 0.32   | a  |
|                               | PB                  | 1.03 ± 0.07   | b  | 1.08 ± 0.03   | b   | 1.45 ± 0.07   | a  | 1.02 ± 0.06   | b  | 1.41 ± 0.01   | a  |
| <i>isoamyl acetate</i>        |                     |               |    |               |     |               |    |               |    |               |    |
|                               | PAF                 | 744 ± 40      | c  | 847 ± 14      | bc  | 903 ± 58      | b  | 737 ± 98      | c  | 1030 ± 20     | a  |
|                               | PB                  | 532 ± 55      | bc | 588 ± 53      | ab  | 501 ± 19      | bc | 475 ± 3       | c  | 627 ± 29      | a  |
| <i>cis-3-hexenyl acetate</i>  |                     |               |    |               |     |               |    |               |    |               |    |
|                               | PAF                 | 0.118 ± 0.008 | bc | 0.118 ± 0.003 | bc  | 0.130 ± 0.006 | ab | 0.111 ± 0.019 | c  | 0.143 ± 0.005 | a  |
|                               | PB                  | 0.093 ± 0.012 | bc | 0.100 ± 0.001 | ab  | 0.112 ± 0.008 | a  | 0.077 ± 0.006 | c  | 0.108 ± 0.008 | ab |
| <i>phenylethyl acetate</i>    |                     |               |    |               |     |               |    |               |    |               |    |
|                               | PAF                 | 43.2 ± 0.5    | b  | 43.4 ± 0.9    | b   | 42.6 ± 1.8    | b  | 54.7 ± 5.4    | a  | 58.5 ± 2.6    | a  |
|                               | PB                  | 45.5 ± 2.6    | a  | 44.8 ± 4.2    | a   | 46.3 ± 4.8    | a  | 35.9 ± 1.9    | b  | 48.3 ± 2.2    | a  |
| <i>ethyl isobutyrate</i>      |                     |               |    |               |     |               |    |               |    |               |    |
|                               | PAF                 | 11.8 ± 1.4    | a  | 13.1 ± 0.6    | a   | 13.5 ± 1.7    | a  | 12.6 ± 0.8    | a  | 13.2 ± 0.7    | a  |
|                               | PB                  | 10.2 ± 0.7    | a  | 9.4 ± 1.2     | a   | 8.8 ± 0.8     | a  | 9.4 ± 0.7     | a  | 9.5 ± 0.8     | a  |
| <i>ethyl 2-methylbutyrate</i> |                     |               |    |               |     |               |    |               |    |               |    |
|                               | PAF                 | 3.4 ± 0.3     | b  | 4.0 ± 0.2     | a   | 4.0 ± 0.3     | a  | 4.0 ± 0.2     | a  | 4.5 ± 0.4     | a  |
|                               | PB                  | 2.4 ± 0.2     | a  | 2.5 ± 0.4     | a   | 2.3 ± 0.1     | a  | 2.5 ± 0.2     | a  | 2.8 ± 0.2     | a  |
| <i>ethyl phenylacetate</i>    |                     |               |    |               |     |               |    |               |    |               |    |
|                               | PAF                 | 1.21 ± 0.34   | a  | 1.07 ± 0.00   | a   | 1.12 ± 0.15   | a  | 0.94 ± 0.20   | a  | 0.88 ± 0.01   | a  |
|                               | PB                  | 1.00 ± 0.15   | a  | 0.60 ± 0.06   | bc  | 0.60 ± 0.04   | c  | 0.81 ± 0.05   | ab | 0.75 ± 0.11   | bc |
| <i>ethyl propanoate</i>       |                     |               |    |               |     |               |    |               |    |               |    |
|                               | PAF                 | 83 ± 1        | b  | 110 ± 3       | a   | 108 ± 12      | a  | 108 ± 9       | a  | 128 ± 11      | a  |
|                               | PB                  | 69 ± 4        | c  | 78 ± 4        | b   | 74 ± 4        | bc | 75 ± 4        | bc | 87 ± 4        | a  |
| <i>ethyl cinnamate</i>        |                     |               |    |               |     |               |    |               |    |               |    |
|                               | PAF                 | 0.628 ± 0.045 | c  | 0.664 ± 0.004 | c   | 0.800 ± 0.078 | bc | 1.109 ± 0.014 | a  | 1.001 ± 0.194 | ab |
|                               | PB                  | 0.674 ± 0.077 | b  | 0.756 ± 0.056 | ab  | 0.857 ± 0.095 | a  | 0.756 ± 0.072 | ab | 0.824 ± 0.030 | a  |
| <i>ethyl dihydrocinnamate</i> |                     |               |    |               |     |               |    |               |    |               |    |
|                               | PAF                 | 0.183 ± 0.024 | c  | 0.216 ± 0.026 | abc | 0.211 ± 0.003 | bc | 0.269 ± 0.020 | a  | 0.263 ± 0.046 | ab |
|                               | PB                  | 0.214 ± 0.021 | a  | 0.242 ± 0.056 | a   | 0.265 ± 0.017 | a  | 0.216 ± 0.015 | a  | 0.245 ± 0.012 | a  |
| <i>hexanol</i>                |                     |               |    |               |     |               |    |               |    |               |    |

|                             |                 |    |                 |    |                 |    |                 |    |                 |   |
|-----------------------------|-----------------|----|-----------------|----|-----------------|----|-----------------|----|-----------------|---|
| PAF                         | 17.1 ± 0.8      | a  | 16.7 ± 1.1      | a  | 19.7 ± 2.3      | a  | 28.1 ± 1.3      | a  | 20.7 ± 5.4      | a |
| PB                          | 19.6 ± 1.1      | a  | 18.5 ± 1.3      | a  | 20.6 ± 1.2      | a  | 21.5 ± 1.2      | a  | 20.2 ± 2.8      | a |
| <i>trans-3-hexanol</i>      |                 |    |                 |    |                 |    |                 |    |                 |   |
| PAF                         | 1.74 ± 0.03     | a  | 1.77 ± 0.08     | a  | 1.79 ± 0.05     | a  | 1.92 ± 0.19     | a  | 1.91 ± 0.16     | a |
| PB                          | 1.80 ± 0.03     | a  | 1.81 ± 0.11     | a  | 1.82 ± 0.02     | a  | 1.79 ± 0.09     | a  | 1.81 ± 0.03     | a |
| <i>cis-3-hexanol</i>        |                 |    |                 |    |                 |    |                 |    |                 |   |
| PAF                         | 3.50 ± 0.04     | a  | 3.61 ± 0.24     | a  | 3.72 ± 0.11     | a  | 4.08 ± 0.49     | a  | 3.92 ± 0.50     | a |
| PB                          | 3.69 ± 0.07     | a  | 3.67 ± 0.16     | a  | 3.88 ± 0.02     | a  | 3.72 ± 0.20     | a  | 3.79 ± 0.20     | a |
| <i>cis-2-hexanol</i>        |                 |    |                 |    |                 |    |                 |    |                 |   |
| PAF                         | 3.97 ± 0.01     | a  | 3.96 ± 0.02     | a  | 3.99 ± 0.02     | a  | 3.99 ± 0.04     | a  | 4.01 ± 0.07     | a |
| PB                          | 3.95 ± 0.00     | a  | 3.98 ± 0.07     | a  | 3.96 ± 0.01     | a  | 3.93 ± 0.02     | a  | 3.93 ± 0.01     | a |
| <i>trans-geraniol</i>       |                 |    |                 |    |                 |    |                 |    |                 |   |
| PAF                         | 18.0 ± 2.1      | a  | 20.1 ± 0.6      | a  | 18.0 ± 0.9      | a  | 18.7 ± 0.3      | a  | 18.5 ± 0.5      | a |
| PB                          | 15.2 ± 0.7      | a  | 15.2 ± 1.5      | a  | 16.6 ± 0.6      | a  | 17.1 ± 0.7      | a  | 17.1 ± 1.6      | a |
| <i>α-terpinene</i>          |                 |    |                 |    |                 |    |                 |    |                 |   |
| PAF                         | 0.0371 ± 0.0005 | b  | 0.0422 ± 0.0042 | b  | 0.0409 ± 0.0005 | b  | 0.0389 ± 0.0022 | b  | 0.0668 ± 0.0173 | a |
| PB                          | 0.0385 ± 0.0001 | b  | 0.0421 ± 0.0085 | b  | 0.0342 ± 0.0004 | b  | 0.0412 ± 0.0016 | b  | 0.0818 ± 0.0133 | a |
| <i>γ-terpinene</i>          |                 |    |                 |    |                 |    |                 |    |                 |   |
| PAF                         | 0.037 ± 0.006   | b  | 0.037 ± 0.002   | b  | 0.036 ± 0.001   | b  | 0.035 ± 0.001   | b  | 0.052 ± 0.010   | a |
| PB                          | 0.036 ± 0.003   | b  | 0.035 ± 0.004   | b  | 0.034 ± 0.004   | b  | 0.034 ± 0.001   | b  | 0.048 ± 0.008   | a |
| <i>terpinolene</i>          |                 |    |                 |    |                 |    |                 |    |                 |   |
| PAF                         | 0.046 ± 0.002   | b  | 0.060 ± 0.009   | b  | 0.052 ± 0.004   | b  | 0.053 ± 0.006   | b  | 0.088 ± 0.028   | a |
| PB                          | 0.072 ± 0.002   | ab | 0.051 ± 0.011   | bc | 0.042 ± 0.001   | c  | 0.051 ± 0.005   | bc | 0.077 ± 0.023   | a |
| <i>linalool</i>             |                 |    |                 |    |                 |    |                 |    |                 |   |
| PAF                         | 1.57 ± 0.20     | c  | 1.78 ± 0.15     | bc | 1.69 ± 0.09     | bc | 1.83 ± 0.07     | b  | 2.10 ± 0.08     | a |
| PB                          | 1.78 ± 0.08     | b  | 1.85 ± 0.09     | b  | 1.91 ± 0.08     | b  | 1.98 ± 0.06     | b  | 2.23 ± 0.23     | a |
| <i>α-terpineol</i>          |                 |    |                 |    |                 |    |                 |    |                 |   |
| PAF                         | 29.0 ± 1.1      | b  | 55.6 ± 1.8      | b  | 43.0 ± 17.4     | b  | 31.8 ± 12.8     | b  | 301.9 ± 87.5    | a |
| PB                          | 27.8 ± 3.0      | b  | 46.1 ± 3.0      | b  | 44.9 ± 17.2     | b  | 27.6 ± 14.2     | b  | 287.1 ± 108.4   | a |
| <i>trans-geranylacetone</i> |                 |    |                 |    |                 |    |                 |    |                 |   |
| PAF                         | 0.245 ± 0.017   | a  | 0.211 ± 0.004   | a  | 0.219 ± 0.025   | a  | 0.255 ± 0.049   | a  | 0.284 ± 0.005   | a |
| PB                          | 0.449 ± 0.046   | a  | 0.153 ± 0.049   | a  | 0.152 ± 0.002   | a  | 0.282 ± 0.044   | a  | 0.244 ± 0.020   | a |
| <i>citronellol</i>          |                 |    |                 |    |                 |    |                 |    |                 |   |
| PAF                         | 22.3 ± 2.9      | a  | 23.6 ± 0.7      | a  | 22.1 ± 0.4      | a  | 22.6 ± 1.6      | a  | 23.8 ± 1.6      | a |
| PB                          | 18.4 ± 0.9      | b  | 17.2 ± 0.4      | b  | 17.6 ± 0.6      | b  | 19.5 ± 1.8      | ab | 21.2 ± 1.5      | a |
| <i>nerolidol</i>            |                 |    |                 |    |                 |    |                 |    |                 |   |
| PAF                         | 0.164 ± 0.022   | c  | 0.175 ± 0.007   | bc | 0.204 ± 0.010   | b  | 0.181 ± 0.012   | bc | 0.235 ± 0.021   | a |
| PB                          | 0.391 ± 0.019   | c  | 0.296 ± 0.027   | d  | 0.199 ± 0.005   | e  | 0.459 ± 0.040   | b  | 0.525 ± 0.035   | a |
| <i>β-ionone</i>             |                 |    |                 |    |                 |    |                 |    |                 |   |
| PAF                         | 0.145 ± 0.024   | b  | 0.135 ± 0.001   | b  | 0.141 ± 0.009   | b  | 0.159 ± 0.016   | ab | 0.183 ± 0.010   | a |
| PB                          | 0.128 ± 0.001   | b  | 0.125 ± 0.019   | b  | 0.161 ± 0.015   | a  | 0.133 ± 0.019   | b  | 0.125 ± 0.008   | b |
| <i>β-damascenone</i>        |                 |    |                 |    |                 |    |                 |    |                 |   |
| PAF                         | 0.111 ± 0.079   | a  | 0.148 ± 0.002   | a  | 0.139 ± 0.006   | a  | 0.132 ± 0.032   | a  | 0.144 ± 0.000   | a |
| PB                          | 0.501 ± 0.045   | ab | 0.448 ± 0.082   | bc | 0.584 ± 0.030   | a  | 0.414 ± 0.073   | bc | 0.366 ± 0.036   | c |

<sup>a</sup> The significant difference ( $P \leq 0.05$ ) among treatments was calculated across the row.
