# Supplementary material
Source: MDPI journal article supplement (https://www.mdpi.com/2306-5710/5/4/70)
Supplement: s1 [file s1]

Supplementary Table 1. Analytical standards used for the chemical analysis.

| standard                             | producer                                          |
|--------------------------------------|---------------------------------------------------|
| <i>metals</i>                        |                                                   |
| Cu                                   | ICP grade, Sigma-Aldrich, Switzerland             |
| Fe                                   | ICP grade, Sigma-Aldrich, Switzerland             |
| Al                                   | ICP grade, Sigma-Aldrich, Switzerland             |
| MgSO <sub>4</sub> ·7H <sub>2</sub> O | 99.5%, Emsure, Merk, Germany                      |
| Mn                                   | ICP grade, Sigma-Aldrich, Switzerland             |
| Zn                                   | ICP grade, Sigma-Aldrich, Switzerland             |
| <i>LMWSCs</i>                        |                                                   |
| sodium sulfide                       | 99.5%, Aldrich, Sigma-Aldrich, France             |
| sodium methanethiolate               | 90%, Aldrich, Sigma-Aldrich, US                   |
| dimethyl disulfide                   | 99%, Aldrich, Sigma-Aldrich, France               |
| carbon disulfide                     | 99%, Aldrich, Sigma-Aldrich, USA                  |
| <i>aldehyde compounds</i>            |                                                   |
| methional                            | 97%, Aldrich, Sigma-Aldrich, US                   |
| 2-methylpropanal                     | analytical standard, Sigma-Aldrich, China         |
| 3-methylbutanal                      | analytical standard, Sigma-Aldrich, Germany       |
| phenylacetaldehyde                   | 95%, Sigma-Aldrich, Germany                       |
| 5-methylfurfural                     | analytical standard, Sigma-Aldrich, China,        |
| benzaldehyde                         | 99%, Sigma-Aldrich, China                         |
| hexanal                              | 98%, Alfa Aesar, UK                               |
| furfural                             | 99%, Aldrich, Sigma-Aldrich, USA                  |
| nonanal                              | 95%, Sigma, Sigma-Aldrich, USA                    |
| ( <i>E</i> )-2-hexenal               | 98%, Alfa Aesar, UK                               |
| ( <i>E</i> )-2-heptenal              | analytical standard, Sigma-Aldrich, USA           |
| ( <i>E</i> )-2-octenal               | 95%, Alfa Aesar, UK                               |
| ( <i>E</i> )-2-nonenal               | 97%, Alfa Aesar, UK                               |
| <i>alcohols</i>                      |                                                   |
| methionol                            | 98%, Aldrich, Sigma-Aldrich, USA                  |
| furaneol                             | 99%, Aldrich, Sigma-Aldrich                       |
| homofuraneol                         | 96%, Sigma-Aldrich                                |
| maltol                               | 99%, Aldrich, Sigma-Aldrich, Germany              |
| sotolon                              | analytical standard, Sigma-Aldrich, China         |
| <i>esters</i>                        |                                                   |
| ethyl butyrate                       | analytical standard, Sigma-Aldrich, Germany       |
| ethyl hexanoate                      | 98%, Sigma-Aldrich                                |
| ethyl octanoate                      | 98%, Sigma-Aldrich                                |
| ethyl decanoate                      | analytical standard, Fluke, Sigma-Aldrich, France |
| ethyl dodecanoate                    | 98%, Sigma-Aldrich                                |
| propyl acetate                       | 98%, Alfa Aesar, UK                               |
| isobutyl acetate                     | 99%, Sigma-Aldrich, USA                           |
| butyl acetate                        | 99%, Alfa Aesar, UK                               |
| isoamyl acetate                      | 98%, Sigma-Aldrich, USA                           |
| phenylethyl acetate                  | analytical standard, Sigma-Aldrich, Germany       |
| ethyl isobutyrate                    | 99%, Aldrich, Sigma-Aldrich                       |
| ethyl 2-methylbutyrate               | 99%, Aldrich, Sigma-Aldrich, USA                  |
| ethyl isovalerate                    | 98%, Aldrich, Sigma-Aldrich                       |
| ethyl phenylacetate                  | 99%, Alfa Aesar, UK                               |
| ethyl propanoate                     | 99%, Aldrich, Sigma-Aldrich                       |
| ethyl cinnamate                      | 99%, Aldrich, Sigma-Aldrich, Germany              |
| ethyl dihydrocinnamate               | 99%, Aldrich, Sigma-Aldrich, UK                   |
| <i>C6 compounds</i>                  |                                                   |
| hexanol                              | 99%, Alfa Aesar, UK                               |
| ( <i>E</i> )-2-hexenol               | 97%, Aldrich, Sigma-Aldrich, USA                  |
| <i>terpenes</i>                      |                                                   |
| γ-nonalactone                        | analytical standard, Sigma-Aldrich, China         |
| ( <i>E</i> )-geraniol                | 98%, Aldrich, Sigma-Aldrich, USA                  |
| eucalyptol                           | 99%, Aldrich, Sigma-Aldrich, USA                  |

|                             |                                                 |
|-----------------------------|-------------------------------------------------|
| 1,4-cineole                 | analytical standard, Sigma-Aldrich, Switzerland |
| $\alpha$ -terpinene         | 90%, Alfa Aesar, UK                             |
| $\gamma$ -terpinene         | analytical standard, Aldrich, Sigma-Aldrich     |
| terpinolene                 | 85%, Fluka, Sigma-Aldrich, Japan                |
| linalool                    | 95 – 97%, Sigma, Sigma-Aldrich, USA             |
| $\alpha$ -terpineol         | 90%, Aldrich, Sigma-Aldrich, USA                |
| ( <i>E</i> )-geranylacetone | 97%, Alfa Aesar, UK                             |
| citronellol                 | 95%, Aldrich, Sigma-Aldrich, USA                |
| nerolidol                   | 98%, Aldrich, Sigma-Aldrich, USA                |
| <i>C13 compounds</i>        |                                                 |
| $\beta$ -ionone             | 96%, Aldrich, Sigma-Aldrich, Germany            |
| $\beta$ -damascenone        | analytical standard, Sigma-Aldrich, Switzerland |
| <i>protein</i>              |                                                 |
| Bradford reagent            | Sigma, Sigma-Aldrich, USA                       |
| bovine serum albumin (BSA)  | 96%, Sigma, Sigma-Aldrich, USA                  |

---
