# Supplementary material
Source: MDPI journal article supplement (https://www.mdpi.com/2306-5710/5/4/70)
Supplement: s1 [file s1]

Supplementary Table 3. Colour parameters and protein concentrations (Chardonnay only) of Chardonnay and Shiraz (PB) wines.

| <sup>a</sup> Chardonnay                               | Control         |    | LCu             |    | HCu             |    | LSO2            |    | HSO2            |    |
|-------------------------------------------------------|-----------------|----|-----------------|----|-----------------|----|-----------------|----|-----------------|----|
| <i>estimate of brown pigments (<sup>b</sup> a.u.)</i> |                 |    |                 |    |                 |    |                 |    |                 |    |
| PCold                                                 | 0.101 ± 0.002   | b  | 0.114 ± 0.002   | a  | 0.123 ± 0.002   | a  | 0.096 ± 0.006   | b  | 0.104 ± 0.002   | b  |
| PB_nonB                                               | 0.096 ± 0.102   | ab | 0.102 ± 0.002   | ab | 0.102 ± 0.006   | a  | 0.090 ± 0.008   | b  | 0.097 ± 0.002   | ab |
| PB_Bent                                               | 0.097 ± 0.104   | b  | 0.104 ± 0.001   | b  | 0.112 ± 0.005   | a  | 0.095 ± 0.005   | b  | 0.098 ± 0.002   | b  |
| <i>total phenolics (a.u.)</i>                         |                 |    |                 |    |                 |    |                 |    |                 |    |
| PCold                                                 | 50.8 ± 0.8      | a  | 51.1 ± 0.8      | a  | 50.7 ± 1.5      | a  | 51.8 ± 0.5      | a  | 51.4 ± 0.8      | a  |
| PB_nonB                                               | 49.6 ± 0.3      | a  | 45.5 ± 0.1      | b  | 43.9 ± 2.4      | b  | 45.5 ± 0.8      | b  | 45.5 ± 1.2      | b  |
| PB_Bent                                               | 51.8 ± 0.4      | a  | 50.6 ± 1.3      | a  | 50.0 ± 2.9      | a  | 52.0 ± 1.0      | a  | 52.1 ± 1.4      | a  |
| <i>total hydroxycinnametes (a.u.)</i>                 |                 |    |                 |    |                 |    |                 |    |                 |    |
| PCold                                                 | 1.449 ± 0.001   | b  | 1.498 ± 0.020   | a  | 1.500 ± 0.037   | a  | 1.433 ± 0.020   | b  | 1.446 ± 0.004   | b  |
| PB_nonB                                               | 0.569 ± 0.011   | a  | 0.578 ± 0.009   | a  | 0.567 ± 0.039   | a  | 0.551 ± 0.024   | a  | 0.567 ± 0.008   | a  |
| PB_Bent                                               | 0.595 ± 0.003   | a  | 0.623 ± 0.015   | a  | 0.622 ± 0.037   | a  | 0.588 ± 0.017   | a  | 0.593 ± 0.008   | a  |
| <i>total flavonoids (a.u.)</i>                        |                 |    |                 |    |                 |    |                 |    |                 |    |
| PCold                                                 | 49.9 ± 0.8      | a  | 50.2 ± 0.8      | a  | 49.7 ± 1.5      | a  | 50.8 ± 0.5      | a  | 50.5 ± 0.8      | a  |
| PB_nonB                                               | 49.2 ± 0.3      | a  | 45.1 ± 0.1      | b  | 43.5 ± 2.4      | b  | 45.1 ± 0.8      | b  | 45.1 ± 1.2      | b  |
| PB_Bent                                               | 51.4 ± 0.4      | a  | 50.2 ± 1.3      | a  | 49.6 ± 2.9      | a  | 51.6 ± 1.1      | a  | 51.7 ± 1.4      | a  |
| <i>protein (mg/L)</i>                                 |                 |    |                 |    |                 |    |                 |    |                 |    |
| PCold                                                 | 0.0239 ± 9.E-04 | a  | 0.0229 ± 1.E-03 | a  | 0.0239 ± 9.E-04 | a  | 0.0238 ± 5.E-04 | a  | 0.0246 ± 1.E-03 | a  |
| PB_nonB                                               | 0.0045 ± 6.E-04 | b  | 0.0080 ± 6.E-04 | ab | 0.0047 ± 3.E-04 | b  | 0.0065 ± 4.E-03 | ab | 0.0110 ± 4.E-04 | a  |
| PB_Bent                                               | 0.0128 ± 4.E-04 | b  | 0.0133 ± 3.E-04 | ab | 0.0136 ± 1.E-03 | ab | 0.0110 ± 1.E-03 | c  | 0.0144 ± 5.E-04 | a  |
| <sup>c</sup> Shiraz                                   | Control         |    | LCu             |    | HCu             |    | LSO2            |    | HSO2            |    |
| colour density (a.u.)                                 | 8.65 ± 0.71     | a  | 8.19 ± 0.32     | a  | 8.35 ± 0.39     | a  | 7.81 ± 0.77     | a  | 8.50 ± 0.76     | a  |
| wine colour hue                                       | 0.71 ± 0.02     | ab | 0.68 ± 0.01     | b  | 0.70 ± 0.02     | ab | 0.72 ± 0.01     | a  | 0.69 ± 0.02     | ab |
| degree of red pigment colouration                     | 18.26 ± 2.03    | a  | 17.01 ± 1.68    | a  | 19.27 ± 0.91    | a  | 16.87 ± 2.09    | a  | 16.58 ± 0.65    | a  |
| estimate of SO <sub>2</sub> resistance pigment (a.u.) | 1.70 ± 0.11     | a  | 1.37 ± 0.10     | c  | 1.39 ± 0.08     | c  | 1.47 ± 0.15     | bc | 1.63 ± 0.12     | ab |
| total red pigments (a.u.)                             | 27.94 ± 2.83    | a  | 28.82 ± 2.12    | a  | 25.52 ± 0.41    | a  | 27.00 ± 1.57    | a  | 28.01 ± 2.07    | a  |
| total phenolics (a.u.)                                | 45.32 ± 4.40    | a  | 46.50 ± 4.10    | a  | 41.25 ± 0.79    | a  | 44.18 ± 2.79    | a  | 45.52 ± 2.47    | a  |
| total anthocyanins (mg/L)                             | 558.6 ± 56.6    | a  | 576.1 ± 42.5    | a  | 510.2 ± 8.2     | a  | 539.8 ± 31.3    | a  | 559.9 ± 41.4    | a  |
| <sup>d</sup> chemical age 1                           | 0.31 ± 0.02     | a  | 0.28 ± 0.02     | b  | 0.28 ± 0.01     | ab | 0.30 ± 0.01     | ab | 0.30 ± 0.02     | ab |

<sup>a</sup> The significant difference ( $P \leq 0.05$ ) among treatments was calculated across the row.<sup>b</sup> a.u. stands for absorbance units.<sup>c</sup> Results of Shiraz wines at time point of PB (pre-bottling) only.<sup>d</sup> Chemical age 1: the extent of anthocyanin incorporation into polymeric pigments.
