# Supplementary material
Source: MDPI journal article supplement (https://www.mdpi.com/2306-5710/5/4/70)
Supplement: s1 [file s1]

Supplementary Table 2. Concentrations of Fe (mg/L) in Chardonnay wines, and concentrations (µg/L) of analysed LMWSCs and volatile aldehyde compounds in Chardonnay and Shiraz wines during production and bottle ageing process.

| <sup>a</sup> Chardonnay | Control       |    | LCu            |    | HCu           |    | LSO2          |    | HSO2          |     |  |
|-------------------------|---------------|----|----------------|----|---------------|----|---------------|----|---------------|-----|--|
| <i>Fe</i>               |               |    |                |    |               |    |               |    |               |     |  |
| PAF                     | 0.068 ± 0.003 | a  | 0.073 ± 0.003  | a  | 0.070 ± 0.003 | a  | 0.069 ± 0.002 | a  | 0.072 ± 0     | a   |  |
| PCold                   | 0.068 ± 0.012 | a  | 0.053 ± 0.004  | bc | 0.049 ± 0.006 | c  | 0.062 ± 0.005 | ab | 0.058 ± 0.001 | abc |  |
| PB_nonB                 | 0.048 ± 0.005 | ab | 0.047 ± 0.004  | ab | 0.041 ± 0.005 | b  | 0.058 ± 0.009 | a  | 0.053 ± 0.010 | ab  |  |
| PB_Bent                 | 0.148 ± 0.019 | b  | 0.163 ± 0.023  | ab | 0.133 ± 0.009 | b  | 0.163 ± 0.018 | ab | 0.185 ± 0.004 | a   |  |
| <i>DMS</i>              |               |    |                |    |               |    |               |    |               |     |  |
| J                       | 3.07 ± 0.14   | a  | 3.07 ± 0.14    | a  | 3.07 ± 0.14   | a  | 3.07 ± 0.14   | a  | 3.07 ± 0.14   | a   |  |
| PAF                     | 4.09 ± 0.97   | a  | 3.13 ± 0.21    | b  | 3.12 ± 0.23   | b  | 3.04 ± 0.24   | b  | 3.01 ± 0.08   | b   |  |
| PCold                   | 1.08 ± 0.00   | b  | 0.61 ± 0.03    | c  | 1.36 ± 0.09   | a  | 0.83 ± 0.18   | bc | 1.10 ± 0.15   | b   |  |
| PB_nonB                 | 0.82 ± 0.04   | c  | 1.66 ± 0.30    | b  | 1.16 ± 0.09   | bc | 2.39 ± 0.62   | a  | 1.33 ± 0.39   | bc  |  |
| PB_Bent                 | 1.42 ± 0.20   | bc | 1.61 ± 0.17    | b  | 1.10 ± 0.12   | c  | 2.25 ± 0.29   | a  | 1.16 ± 0.08   | c   |  |
| 15Mo_nonB               | 9.18 ± 0.72   | a  | 10.03 ± 2.17   | a  | 9.87 ± 1.42   | a  | 9.92 ± 0.19   | a  | 10.27 ± 0.30  | a   |  |
| 15Mo_Bent               | 10.71 ± 0.60  | a  | 10.61 ± 0.88   | a  | 8.46 ± 1.60   | c  | 9.52 ± 0.53   | ab | 10.34 ± 0.38  | ab  |  |
| <i>benzaldehyde</i>     |               |    |                |    |               |    |               |    |               |     |  |
| PAF                     | 1.29 ± 0.22   | ab | 1.06 ± 0.07    | b  | 1.60 ± 0.22   | a  | 1.21 ± 0.11   | ab | 1.23 ± 0.25   | ab  |  |
| PCold                   | 2.02 ± 0.26   | a  | 1.92 ± 0.04    | a  | 1.49 ± 0.15   | a  | 1.91 ± 0.28   | a  | 2.08 ± 0.14   | a   |  |
| PB_nonB                 | 2.47 ± 0.45   | ab | 1.67 ± 0.38    | b  | 2.14 ± 0.54   | ab | 2.91 ± 0.57   | a  | 2.33 ± 0.15   | ab  |  |
| PB_Bent                 | 2.03 ± 0.09   | a  | 1.73 ± 0.30    | a  | 2.38 ± 0.16   | a  | 2.39 ± 0.33   | a  | 2.43 ± 0.14   | a   |  |
| 15Mo_nonB               | 3.35 ± 0.50   | b  | 3.46 ± 0.26    | b  | 5.33 ± 0.04   | a  | 4.55 ± 0.51   | a  | 4.99 ± 0.52   | a   |  |
| 15Mo_Bent               | 3.86 ± 0.47   | a  | 4.02 ± 0.42    | a  | 3.88 ± 0.70   | a  | 3.51 ± 0.05   | a  | 3.74 ± 0.77   | a   |  |
| <i>furfural</i>         |               |    |                |    |               |    |               |    |               |     |  |
| PAF                     | 1.21 ± 0.33   | a  | 0.93 ± 0.25    | a  | 1.03 ± 0.14   | a  | 1.01 ± 0.11   | a  | 0.84 ± 0.26   | a   |  |
| PCold                   | 1.76 ± 0.21   | b  | 2.13 ± 0.04    | a  | 2.26 ± 0.25   | a  | 1.45 ± 0.15   | c  | 2.20 ± 0.13   | a   |  |
| PB_nonB                 | 2.21 ± 0.34   | ab | 2.28 ± 0.35    | ab | 2.68 ± 0.10   | a  | 2.32 ± 0.35   | ab | 2.07 ± 0.08   | b   |  |
| PB_Bent                 | 2.66 ± 0.21   | a  | 2.90 ± 0.56    | a  | 3.30 ± 0.09   | a  | 2.60 ± 0.45   | a  | 2.70 ± 0.11   | a   |  |
| 15Mo_nonB               | 53.46 ± 7.81  | a  | 47.77 ± 7.06   | a  | 53.73 ± 3.62  | a  | 46.24 ± 4.66  | a  | 43.52 ± 1.60  | a   |  |
| 15Mo_Bent               | 46.86 ± 5.68  | ab | 49.06 ± 2.68   | a  | 47.56 ± 2.11  | ab | 38.00 ± 2.02  | c  | 41.82 ± 0.70  | bc  |  |
| <i>5-methylfurfural</i> |               |    |                |    |               |    |               |    |               |     |  |
| PAF                     | 0             |    | 0              |    | 0             |    | 0             |    | 0             |     |  |
| PCold                   | 0             |    | 0              |    | 0             |    | 0             |    | 0             |     |  |
| PB_nonB                 | 0             |    | 0              |    | 0             |    | 0             |    | 0             |     |  |
| PB_Bent                 | 0             |    | 0              |    | 0             |    | 0             |    | 0             |     |  |
| 15Mo_nonB               | 1.16 ± 0.08   | ab | 1.22 ± 0.00    | ab | 1.32 ± 0.17   | a  | 1.06 ± 0.08   | b  | 1.28 ± 0.10   | ab  |  |
| 15Mo_Bent               | 0.98 ± 0.13   | a  | 0.91 ± 0.04    | a  | 1.11 ± 0.13   | a  | 0.72 ± 0.08   | b  | 1.01 ± 0.06   | a   |  |
| <i>hexanal</i>          |               |    |                |    |               |    |               |    |               |     |  |
| PAF                     | 1.41 ± 0.11   | a  | 1.34 ± 0.06    | a  | 1.51 ± 0.10   | a  | 1.36 ± 0.07   | a  | 1.49 ± 0.13   | a   |  |
| PCold                   | 1.36 ± 0.01   | b  | 1.52 ± 0.09    | ab | 1.54 ± 0.03   | a  | 1.60 ± 0.11   | a  | 1.58 ± 0.13   | a   |  |
| PB_nonB                 | 1.76 ± 0.11   | ab | 1.50 ± 0.10    | c  | 1.58 ± 0.12   | bc | 1.68 ± 0.05   | ab | 1.82 ± 0.06   | a   |  |
| PB_Bent                 | 2.20 ± 0.10   | a  | 1.81 ± 0.13    | b  | 1.98 ± 0.20   | ab | 2.10 ± 0.06   | a  | 2.21 ± 0.07   | a   |  |
| 15Mo_nonB               | 1.86 ± 0.06   | a  | 1.79 ± 0.12    | a  | 1.75 ± 0.04   | a  | 1.88 ± 0.09   | a  | 1.94 ± 0.13   | a   |  |
| 15Mo_Bent               | 1.92 ± 0.06   | b  | 2.02 ± 0.32    | ab | 1.88 ± 0.04   | b  | 1.83 ± 0.01   | b  | 2.32 ± 0.08   | a   |  |
| <i>nonanal</i>          |               |    |                |    |               |    |               |    |               |     |  |
| PAF                     | 13.05 ± 0.92  | b  | 9.49 ± 0.05    | c  | 22.95 ± 1.04  | a  | 11.27 ± 0.15  | bc | 14.24 ± 2.89  | b   |  |
| PCold                   | 10.10 ± 0.58  | c  | 13.30 ± 0.77   | a  | 12.49 ± 1.09  | ab | 11.32 ± 1.33  | bc | 11.94 ± 0.78  | ab  |  |
| PB_nonB                 | 10.39 ± 0.49  | b  | 11.19 ± 0.22   | b  | 15.40 ± 10.56 | b  | 11.52 ± 1.12  | b  | 35.42 ± 3.72  | a   |  |
| PB_Bent                 | 12.70 ± 0.27  | a  | 8.18 ± 0.48    | b  | 9.00 ± 0.74   | b  | 12.59 ± 0.14  | a  | 13.20 ± 1.00  | a   |  |
| 15Mo_nonB               | 12.66 ± 1.26  | b  | 14.44 ± 0.64   | a  | 15.27 ± 0.83  | a  | 16.15 ± 0.99  | a  | 16.03 ± 0.30  | a   |  |
| 15Mo_Bent               | 12.31 ± 1.25  | a  | 13.26 ± 1.70   | a  | 14.65 ± 1.47  | a  | 15.21 ± 1.41  | a  | 15.41 ± 0.99  | a   |  |
| <i>2-methylpropanal</i> |               |    |                |    |               |    |               |    |               |     |  |
| PAF                     | 43.96 ± 0.51  | a  | 44.88 ± 0.76   | a  | 51.58 ± 14.58 | a  | 47.98 ± 2.26  | a  | 44.16 ± 4.79  | a   |  |
| PCold                   | 53.18 ± 6.77  | b  | 50.11 ± 2.84   | b  | 58.91 ± 4.83  | ab | 53.85 ± 2.99  | b  | 63.37 ± 3.49  | a   |  |
| PB_nonB                 | 57.50 ± 5.25  | ab | 53.54 ± 2.96   | b  | 63.62 ± 5.05  | a  | 60.98 ± 5.09  | ab | 62.66 ± 2.01  | a   |  |
| PB_Bent                 | 66.70 ± 7.78  | a  | 65.12 ± 1.40   | a  | 79.10 ± 24.06 | a  | 72.12 ± 4.63  | a  | 84.58 ± 1.78  | a   |  |
| 15Mo_nonB               | 11.65 ± 0.71  | a  | 11.67 ± 0.40   | a  | 13.28 ± 2.49  | a  | 12.54 ± 0.50  | a  | 11.55 ± 1.51  | a   |  |
| 15Mo_Bent               | 13.18 ± 1.71  | a  | 13.48 ± 0.62   | a  | 14.46 ± 3.31  | a  | 13.33 ± 0.46  | a  | 13.95 ± 0.23  | a   |  |
| <i>3-methylbutanal</i>  |               |    |                |    |               |    |               |    |               |     |  |
| PAF                     | 135.33 ± 2.70 | d  | 150.90 ± 1.18  | c  | 186.96 ± 9.17 | ab | 181.12 ± 2.56 | b  | 194.99 ± 3.13 | a   |  |
| PCold                   | 150.90 ± 3.03 | d  | 176.53 ± 10.31 | c  | 197.47 ± 7.83 | b  | 204.28 ± 1.62 | b  | 232.99 ± 3.44 | a   |  |
| PB_nonB                 | 161.69 ± 4.07 | d  | 174.64 ± 2.78  | c  | 203.90 ± 5.62 | b  | 210.28 ± 3.87 | b  | 230.91 ± 4.22 | a   |  |

|                             |                |    |                |    |                |    |                |     |                |    |
|-----------------------------|----------------|----|----------------|----|----------------|----|----------------|-----|----------------|----|
| PB_Bent                     | 174.67 ± 11.05 | c  | 209.12 ± 12.76 | b  | 229.51 ± 17.72 | ab | 238.13 ± 11.84 | a   | 256.02 ± 3.68  | a  |
| 15Mo_nonB                   | 238.57 ± 3.23  | b  | 257.75 ± 11.85 | b  | 287.15 ± 12.44 | a  | 281.07 ± 3.00  | a   | 301.67 ± 16.73 | a  |
| 15Mo_Bent                   | 239.56 ± 4.80  | d  | 274.86 ± 11.79 | c  | 305.76 ± 16.60 | b  | 290.29 ± 0.39  | bc  | 330.59 ± 1.72  | a  |
| <i>methional</i>            |                |    |                |    |                |    |                |     |                |    |
| PAF                         | 5.28 ± 0.28    | b  | 6.66 ± 0.13    | a  | 5.78 ± 0.32    | b  | 5.22 ± 0.09    | b   | 3.46 ± 0.36    | c  |
| PCold                       | 5.89 ± 2.15    | b  | 8.41 ± 0.77    | a  | 8.46 ± 0.30    | a  | 4.00 ± 0.57    | b   | 4.33 ± 0.76    | b  |
| PB_nonB                     | 3.73 ± 0.32    | b  | 5.23 ± 0.51    | b  | 7.10 ± 1.54    | a  | 5.27 ± 0.20    | b   | 4.89 ± 0.19    | b  |
| PB_Bent                     | 6.35 ± 0.07    | a  | 9.29 ± 1.60    | a  | 9.33 ± 2.51    | a  | 7.63 ± 0.44    | a   | 6.75 ± 0.75    | a  |
| 15Mo_nonB                   | 35.51 ± 5.20   | a  | 35.20 ± 2.55   | a  | 30.56 ± 2.94   | a  | 29.24 ± 2.38   | a   | 31.60 ± 1.68   | a  |
| 15Mo_Bent                   | 31.09 ± 1.51   | ab | 29.02 ± 1.56   | b  | 30.54 ± 1.80   | ab | 32.89 ± 1.76   | a   | 32.29 ± 1.79   | ab |
| <i>2-phenylacetaldehyde</i> |                |    |                |    |                |    |                |     |                |    |
| PAF                         | 3.45 ± 0.18    | c  | 2.33 ± 0.05    | e  | 2.85 ± 0.33    | d  | 4.53 ± 0.22    | b   | 5.30 ± 0.05    | a  |
| PCold                       | 3.55 ± 0.41    | c  | 2.51 ± 0.17    | d  | 2.63 ± 0.30    | d  | 4.52 ± 0.26    | b   | 5.60 ± 0.27    | a  |
| PB_nonB                     | 4.33 ± 0.07    | c  | 2.55 ± 0.23    | d  | 2.64 ± 0.66    | d  | 5.36 ± 0.29    | b   | 6.49 ± 0.26    | a  |
| PB_Bent                     | 4.62 ± 0.02    | bc | 3.37 ± 0.02    | c  | 3.33 ± 0.96    | c  | 5.85 ± 0.75    | ab  | 6.59 ± 0.73    | a  |
| 15Mo_nonB                   | 8.83 ± 0.34    | bc | 6.39 ± 0.58    | d  | 8.21 ± 1.19    | c  | 10.36 ± 0.35   | a   | 9.97 ± 0.42    | ab |
| 15Mo_Bent                   | 7.72 ± 0.62    | c  | 6.93 ± 0.10    | c  | 9.21 ± 0.29    | b  | 9.49 ± 0.20    | ab  | 10.22 ± 0.34   | a  |
| <sup>a</sup> Shiraz         | Control        |    | LCu            |    | HCu            |    | LSO2           |     | HSO2           |    |
| <i>DMS</i>                  |                |    |                |    |                |    |                |     |                |    |
| M                           | 2.76 ± 0.14    | a   | 2.76 ± 0.14    | a  |
| PAF                         | 2.76 ± 0.16    | bc | 2.87 ± 0.06    | ab | 2.97 ± 0.12    | a  | 2.76 ± 0.07    | bc  | 2.67 ± 0.02    | c  |
| PB                          | 0.96 ± 0.06    | a  | 0.90 ± 0.14    | ab | 0.75 ± 0.07    | bc | 0.77 ± 0.11    | abc | 0.63 ± 0.02    | c  |
| 15Mo                        | 17.60 ± 1.05   | a  | 16.10 ± 0.74   | a  | 16.95 ± 0.92   | a  | 17.28 ± 0.90   | a   | 16.29 ± 0.20   | a  |
| <i>benzaldehyde</i>         |                |    |                |    |                |    |                |     |                |    |
| PAF                         | 6.84 ± 0.72    | b  | 7.51 ± 1.04    | ab | 8.22 ± 0.35    | a  | 8.06 ± 0.37    | a   | 7.43 ± 0.30    | ab |
| PB                          | 7.53 ± 0.59    | a  | 7.83 ± 0.33    | a  | 7.92 ± 0.55    | a  | 8.19 ± 0.23    | a   | 8.10 ± 0.41    | a  |
| 15Mo                        | 1.53 ± 0.08    | b  | 1.25 ± 0.19    | c  | 1.14 ± 0.12    | c  | 1.54 ± 0.10    | b   | 1.86 ± 0.10    | a  |
| <i>furfural</i>             |                |    |                |    |                |    |                |     |                |    |
| PAF                         | 2.84 ± 0.27    | b  | 3.33 ± 0.43    | ab | 3.49 ± 0.06    | ab | 3.61 ± 0.48    | a   | 3.60 ± 0.25    | a  |
| PB                          | 4.04 ± 0.34    | ab | 3.58 ± 0.49    | b  | 3.98 ± 0.37    | ab | 4.49 ± 0.21    | a   | 3.80 ± 0.30    | b  |
| 15Mo                        | 22.64 ± 5.18   | bc | 33.45 ± 6.26   | ab | 36.99 ± 6.18   | a  | 16.33 ± 1.24   | c   | 28.55 ± 4.41   | ab |
| <i>5-methylfurfural</i>     |                |    |                |    |                |    |                |     |                |    |
| PAF                         | 0              |    | 0              |    | 0              |    | 0              |     | 0              |    |
| PB                          | 0              |    | 0              |    | 0              |    | 0              |     | 0              |    |
| 15Mo                        | 1.28 ± 0.24    | a  | 1.35 ± 0.26    | a  | 1.20 ± 0.35    | a  | 0.73 ± 0.07    | a   | 0.91 ± 0.21    | a  |
| <i>hexanal</i>              |                |    |                |    |                |    |                |     |                |    |
| PAF                         | 2.09 ± 0.05    | b  | 3.01 ± 0.16    | a  | 2.89 ± 0.38    | a  | 2.49 ± 0.33    | ab  | 2.56 ± 0.30    | ab |
| PB                          | 1.61 ± 0.14    | a  | 1.68 ± 0.13    | a  | 1.69 ± 0.07    | a  | 1.64 ± 0.09    | a   | 1.54 ± 0.06    | a  |
| 15Mo                        | 2.43 ± 0.22    | a  | 2.12 ± 0.26    | a  | 2.03 ± 0.26    | a  | 2.10 ± 0.25    | a   | 2.16 ± 0.29    | a  |
| <i>nonanal</i>              |                |    |                |    |                |    |                |     |                |    |
| PAF                         | 5.32 ± 0.14    | b  | 7.20 ± 1.47    | a  | 6.70 ± 0.32    | ab | 5.72 ± 0.43    | b   | 6.13 ± 0.58    | ab |
| PB                          | 5.48 ± 0.70    | a  | 6.75 ± 1.59    | a  | 5.55 ± 0.08    | a  | 6.16 ± 1.05    | a   | 5.01 ± 0.24    | a  |
| 15Mo                        | 7.42 ± 0.47    | b  | 7.67 ± 0.49    | b  | 21.24 ± 1.31   | a  | 21.17 ± 0.97   | a   | 22.06 ± 1.35   | a  |
| <i>2-methylpropanal</i>     |                |    |                |    |                |    |                |     |                |    |
| PAF                         | 4.40 ± 0.13    | a  | 4.19 ± 0.27    | a  | 4.53 ± 0.09    | a  | 4.43 ± 0.45    | a   | 4.13 ± 0.20    | a  |
| PB                          | 2.13 ± 0.18    | a  | 2.13 ± 0.11    | a  | 2.28 ± 0.10    | a  | 1.83 ± 0.13    | b   | 2.03 ± 0.21    | ab |
| 15Mo                        | 6.55 ± 0.96    | a  | 5.67 ± 0.91    | a  | 5.12 ± 0.71    | a  | 5.76 ± 0.19    | a   | 5.12 ± 0.59    | a  |
| <i>3-methylbutanal</i>      |                |    |                |    |                |    |                |     |                |    |
| PAF                         | 274.01 ± 11.43 | b  | 321.90 ± 24.32 | a  | 340.31 ± 20.11 | a  | 336.54 ± 12.64 | a   | 340.27 ± 3.23  | a  |
| PB                          | 238.56 ± 30.12 | a  | 247.58 ± 7.06  | a  | 266.37 ± 15.62 | a  | 233.34 ± 19.72 | a   | 225.10 ± 26.72 | a  |
| 15Mo                        | 258.15 ± 24.41 | a  | 221.21 ± 10.29 | a  | 232.46 ± 18.21 | a  | 239.86 ± 23.47 | a   | 220.76 ± 41.88 | a  |
| <i>methional</i>            |                |    |                |    |                |    |                |     |                |    |
| PAF                         | 6.20 ± 0.50    | b  | 7.62 ± 0.64    | a  | 6.65 ± 0.42    | b  | 6.76 ± 0.39    | b   | 6.64 ± 0.26    | b  |
| PB                          | 4.80 ± 0.36    | a  | 4.64 ± 0.37    | a  | 4.45 ± 0.05    | a  | 4.44 ± 0.23    | a   | 3.86 ± 0.10    | b  |
| 15Mo                        | 169.75 ± 15.21 | ab | 177.82 ± 16.51 | a  | 176.44 ± 10.61 | a  | 143.02 ± 16.49 | b   | 162.44 ± 6.45  | ab |
| <i>2-phenylacetaldehyde</i> |                |    |                |    |                |    |                |     |                |    |
| PAF                         | 2.62 ± 0.36    | c  | 3.59 ± 0.30    | ab | 3.77 ± 0.18    | a  | 3.16 ± 0.25    | b   | 3.24 ± 0.22    | b  |
| PB                          | 1.56 ± 0.28    | bc | 2.00 ± 0.21    | ab | 2.21 ± 0.11    | a  | 2.05 ± 0.29    | a   | 1.52 ± 0.18    | c  |
| 15Mo                        | 8.86 ± 1.71    | a  | 6.55 ± 1.09    | b  | 7.66 ± 0.50    | ab | 6.69 ± 1.01    | b   | 6.56 ± 0.73    | b  |

<sup>a</sup> The significant difference ( $P \leq 0.05$ ) among treatments was calculated across the row.
